# Supplementary material for: Risk Biomarkers for Biochemical Recurrence after Radical Prostatectomy for Prostate Cancer Using Clinical and MRI-Derived Semantic Features
Source: MDPI journal article supplement (doi:10.3390/cancers15215296), 2023-11-05
Supplement: s1 [file s1]

# **Risk biomarkers for biochemical recurrence after radical prostatectomy for prostate cancer using clinical and MRI-derived semantic features**

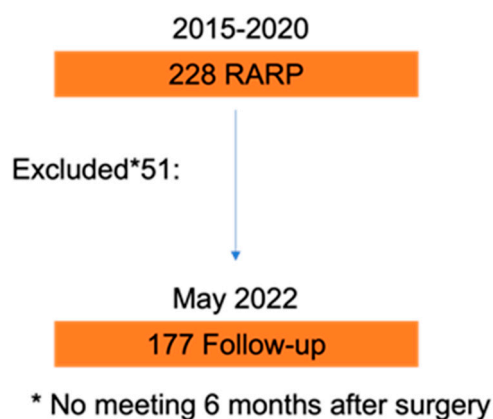

**Figure S1.** Flowchart of the patient selection process

**Table S1.** Results from fitting a multivariable Cox proportional hazards regression model.

| Variable                       | Coefficient | SE    | Hazard Ratio<br>(95% CI) | <i>p</i> -value |
|--------------------------------|-------------|-------|--------------------------|-----------------|
| Prostate Specific Antigen, PSA | 0.078       | 0.036 | 1.081<br>(1.007, 1.161)  | 0.031           |
| Capsular contact length        | 0.063       | 0.019 | 1.065<br>(1.026, 1.106)  | 0.001           |
| Capsular disruption            |             |       |                          |                 |
| Yes                            | 0.955       | 0.428 | 2.598<br>(1.123, 6.011)  | 0.026           |
| Measurable ECE                 |             |       |                          |                 |
| Yes                            | -0.078      | 0.445 | 0.925<br>(0.387, 2.212)  | 0.860           |
| Grade Group (GG) high risk     |             |       |                          |                 |
| GG ≥ 4                         | 0.959       | 0.438 | 2.609<br>(1.106, 6.152)  | 0.028           |

CI: Confidence Interval
